# Supplementary material for: Incremental improvements of 2030 targets insufficient to achieve the Paris Agreement goals
Source: Copernicus journal article supplement (doi:10.5194/esd-11-697-2020), 2020-08-03
Supplement: Supplementary file 1 [file esd-11-697-2020-supplement.zip]

Archive with 2 entries (2 files):
- esd-11-697-2020-supplement-title-page.pdf
- S1.png
