# Supplementary material for: Incremental improvements of 2030 targets insufficient to achieve the Paris Agreement goals
Source: Copernicus journal article supplement (doi:10.5194/esd-11-697-2020), 2020-08-03
Supplement: Supplementary file 1 [file esd-11-697-2020-supplement.zip › esd-11-697-2020-supplement-title-page.pdf]

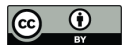

## *Supplement of*

# **Incremental improvements of 2030 targets insufficient to achieve the Paris Agreement goals**

**Andreas Geiges et al.**

*Correspondence to:* Andreas Geiges ([andreas.geiges@climateanalytics.org](mailto:andreas.geiges@climateanalytics.org))

- [esd-11-697-2020-supplement-title-page.pdf](#)
- [S1.png](#)

The copyright of individual parts of the supplement might differ from the CC BY 4.0 License.
