# Supplementary figures and images for: Incremental improvements of 2030 targets insufficient to achieve the Paris Agreement goals
Source: Copernicus journal article supplement (doi:10.5194/esd-11-697-2020), 2020-08-03

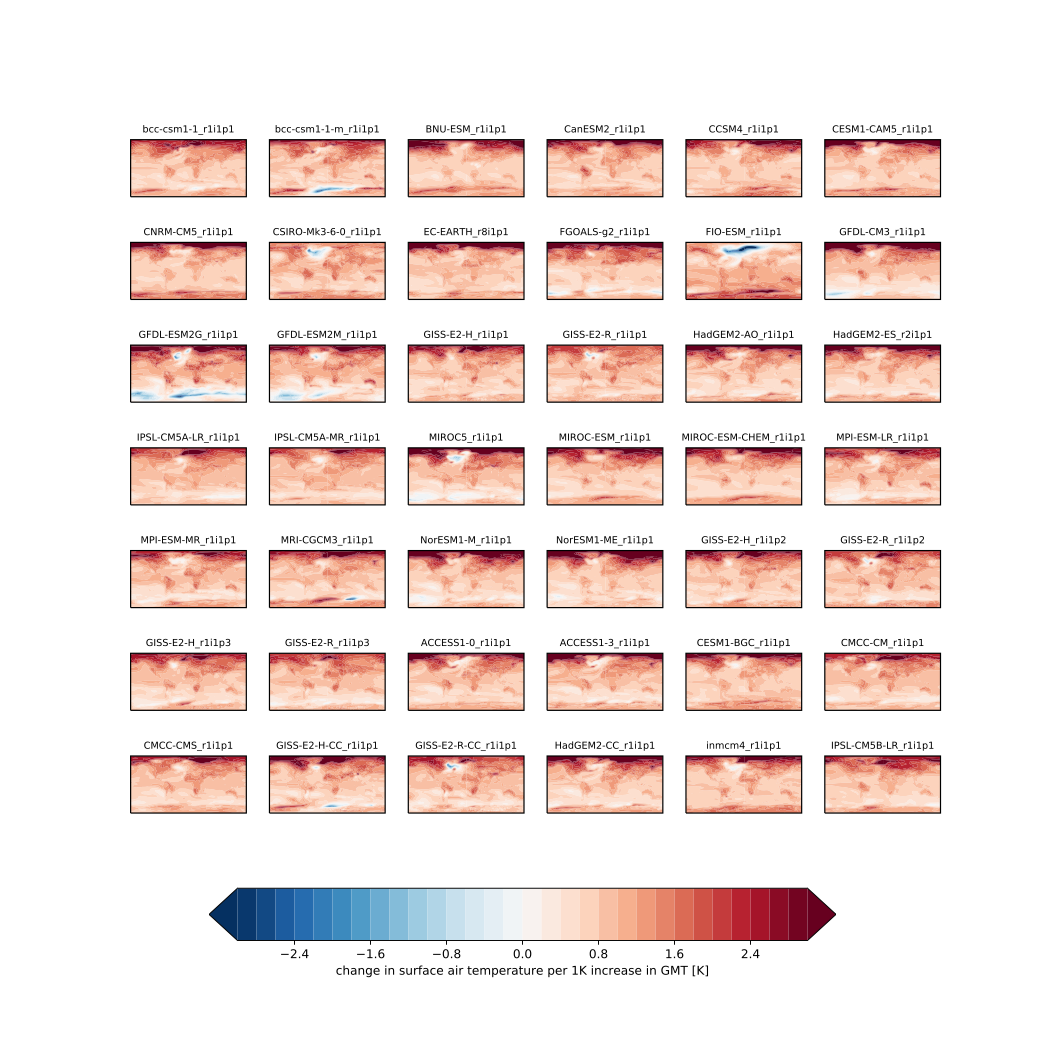

Supplement: Supplementary file 1 [file esd-11-697-2020-supplement.zip › S1.png]
